# Supplementary material
Source: PubMed Central journal article supplement (PMC2754665)
Supplement: es9006993_si_001.pdf [file es9006993_si_001.pdf]

## **Supporting Information**

### **ISOTOPIC VARIABILITY OF MERCURY IN ORE, MINE-WASTE CALCINE, AND LEACHATES OF MINE-WASTE CALCINE FROM AREAS MINED FOR MERCURY**

Sarah J. Stetson\*<sup>1</sup>, John E. Gray<sup>2</sup>, Richard B. Wanty<sup>2</sup>, and Donald L. Macalady<sup>1</sup>

<sup>1</sup> Colorado School of Mines, Department of Chemistry and Geochemistry, 1500 Illinois St, Golden, Colorado 80401

<sup>2</sup> U.S. Geological Survey, P.O. Box 25046, Denver, Colorado 80225

Contents:

Total number of pages: 7

Number of tables: 3

Number of Figures: 1

Table S-1:  $\delta^x\text{Hg}$  values relative to NIST 3133 for all samples of Hg ore, mine-waste calcine and leachates of mine-waste calcine analyzed in this study.

| Sample <sup>a</sup>           | n  | $\delta^{202}\text{Hg}$ |                  | $\delta^{201}\text{Hg}$ |                  | $\delta^{200}\text{Hg}$ |                  | $\delta^{199}\text{Hg}$ |                  | $\Delta 201\text{Hg}^c$ | 2sd  | $\Delta 200\text{Hg}^c$ | 2sd  | $\Delta 199\text{Hg}^c$ | 2sd  |
|-------------------------------|----|-------------------------|------------------|-------------------------|------------------|-------------------------|------------------|-------------------------|------------------|-------------------------|------|-------------------------|------|-------------------------|------|
|                               |    | (‰)                     | 2sd <sup>b</sup> |                         |      |                         |      |                         |      |
| UM-Almadén 1 $\mu\text{g/L}$  | 38 | -0.61                   | 0.24             | -0.46                   | 0.1              | -0.3                    | 0.14             | -0.14                   | 0.1              | -0.01                   | 0.11 | 0.01                    | 0.06 | 0.01                    | 0.10 |
| UM-Almadén 2 $\mu\text{g/L}$  | 18 | -0.58                   | 0.09             | -0.45                   | 0.08             | -0.28                   | 0.05             | -0.16                   | 0.06             | -0.01                   | 0.06 | 0.01                    | 0.03 | -0.02                   | 0.05 |
| Mine-waste calcine-Terlingua  |    |                         |                  |                         |                  |                         |                  |                         |                  |                         |      |                         |      |                         |      |
| 03MAR1                        | 2  | 1.04                    | 0.24             | 0.78                    | 0.10             | 0.53                    | 0.14             | 0.23                    | 0.10             | -0.01                   | 0.06 | 0.00                    | 0.03 | -0.03                   | 0.05 |
| 03MAR2                        | 2  | 0.76                    | 0.24             | 0.53                    | 0.10             | 0.36                    | 0.14             | 0.14                    | 0.10             | -0.04                   | 0.06 | -0.02                   | 0.03 | -0.05                   | 0.05 |
| 03MAR3                        | 2  | 0.46                    | 0.24             | 0.37                    | 0.15             | 0.25                    | 0.14             | 0.15                    | 0.10             | 0.03                    | 0.06 | 0.02                    | 0.03 | 0.03                    | 0.05 |
| 03MSM1                        | 4  | 0.39                    | 0.24             | 0.21                    | 0.17             | 0.12                    | 0.40             | -0.07                   | 0.38             | -0.08                   | 0.05 | -0.08                   | 0.36 | -0.17                   | 0.36 |
| 03MSM2                        | 2  | 0.64                    | 0.46             | 0.34                    | 0.64             | 0.33                    | 0.25             | 0.10                    | 0.17             | -0.15                   | 0.14 | 0.01                    | 0.01 | -0.06                   | 0.05 |
| 03MSM3                        | 3  | 1.52                    | 0.32             | 1.02                    | 0.24             | 0.74                    | 0.19             | 0.25                    | 0.12             | -0.13                   | 0.06 | -0.03                   | 0.03 | -0.13                   | 0.05 |
| 03MSM4                        | 2  | 0.64                    | 0.24             | 0.45                    | 0.10             | 0.34                    | 0.14             | 0.14                    | 0.10             | -0.03                   | 0.06 | 0.02                    | 0.03 | -0.02                   | 0.05 |
| 03MSM5                        | 2  | 0.7                     | 0.24             | 0.49                    | 0.10             | 0.33                    | 0.14             | 0.09                    | 0.10             | -0.04                   | 0.06 | -0.02                   | 0.03 | -0.09                   | 0.05 |
| 03SB1                         | 4  | -0.46                   | 0.24             | -0.20                   | 0.14             | -0.18                   | 0.14             | 0.12                    | 0.10             | 0.14                    | 0.06 | 0.05                    | 0.03 | 0.23                    | 0.05 |
| 03SB2                         | 2  | -0.47                   | 0.24             | -0.32                   | 0.10             | -0.24                   | 0.14             | -0.06                   | 0.10             | 0.03                    | 0.06 | 0.00                    | 0.03 | 0.05                    | 0.05 |
| 03SB3                         | 2  | -1.34                   | 0.28             | -0.97                   | 0.24             | -0.65                   | 0.14             | -0.20                   | 0.10             | 0.04                    | 0.06 | 0.03                    | 0.03 | 0.14                    | 0.05 |
| 03SB4                         | 2  | -0.53                   | 0.24             | -0.38                   | 0.10             | -0.25                   | 0.14             | -0.11                   | 0.10             | 0.01                    | 0.06 | 0.01                    | 0.03 | 0.02                    | 0.05 |
| 03SB5                         | 2  | -0.6                    | 0.24             | -0.42                   | 0.10             | -0.30                   | 0.14             | -0.09                   | 0.10             | 0.04                    | 0.06 | 0.00                    | 0.03 | 0.07                    | 0.05 |
| 03TER1                        | 2  | 0.08                    | 0.24             | 0.15                    | 0.23             | 0.10                    | 0.14             | 0.12                    | 0.10             | 0.10                    | 0.11 | 0.06                    | 0.06 | 0.10                    | 0.14 |
| 03TER2                        | 2  | 0.31                    | 0.24             | 0.27                    | 0.10             | 0.19                    | 0.14             | 0.12                    | 0.10             | 0.04                    | 0.11 | 0.03                    | 0.06 | 0.04                    | 0.10 |
| 03TER3                        | 2  | 0.61                    | 0.24             | 0.41                    | 0.10             | 0.32                    | 0.14             | 0.13                    | 0.10             | -0.05                   | 0.11 | 0.02                    | 0.06 | -0.02                   | 0.10 |
| 03TER4                        | 2  | 0.6                     | 0.24             | 0.43                    | 0.27             | 0.27                    | 0.14             | 0.04                    | 0.11             | -0.02                   | 0.18 | -0.03                   | 0.04 | -0.12                   | 0.14 |
| 03TER5                        | 2  | 0.3                     | 0.24             | 0.10                    | 0.43             | 0.11                    | 0.14             | 0.02                    | 0.10             | -0.12                   | 0.32 | -0.04                   | 0.06 | -0.05                   | 0.10 |
| Mine-waste calcine -McDermitt |    |                         |                  |                         |                  |                         |                  |                         |                  |                         |      |                         |      |                         |      |
| 99MCD1                        | 4  | -1.49                   | 0.29             | -1.05                   | 0.24             | -0.73                   | 0.16             | -0.21                   | 0.17             | 0.07                    | 0.15 | 0.02                    | 0.08 | 0.17                    | 0.11 |
| 99MCD2                        | 3  | -0.22                   | 0.24             | -0.12                   | 0.10             | -0.12                   | 0.16             | -0.07                   | 0.10             | 0.05                    | 0.15 | -0.01                   | 0.07 | -0.02                   | 0.10 |
| 99MCD3a                       | 2  | -0.64                   | 0.24             | -0.45                   | 0.10             | -0.30                   | 0.14             | -0.15                   | 0.10             | 0.03                    | 0.11 | 0.02                    | 0.13 | 0.01                    | 0.10 |
| 99MCD3b                       | 2  | -0.47                   | 0.24             | -0.30                   | 0.12             | -0.29                   | 0.14             | -0.16                   | 0.14             | 0.05                    | 0.11 | -0.05                   | 0.06 | -0.05                   | 0.12 |
| 01MCD2                        | 3  | 0.28                    | 0.24             | 0.25                    | 0.22             | 0.16                    | 0.14             | 0.09                    | 0.18             | 0.05                    | 0.11 | 0.02                    | 0.06 | 0.02                    | 0.13 |

| Hg minerals-Terlingua      |   |       |      |       |      |       |      |       |      |       |      |       |      |       |      |
|----------------------------|---|-------|------|-------|------|-------|------|-------|------|-------|------|-------|------|-------|------|
| Calomel-USGS               | 2 | -0.75 | 0.24 | -0.50 | 0.10 | -0.36 | 0.14 | -0.09 | 0.10 | 0.07  | 0.11 | 0.01  | 0.06 | 0.10  | 0.10 |
| Calomel-CSM                | 3 | -2.05 | 0.31 | -1.38 | 0.28 | -0.98 | 0.18 | -0.22 | 0.10 | 0.17  | 0.11 | 0.05  | 0.03 | 0.30  | 0.05 |
| Montroydite-USGS           | 2 | 1.05  | 0.24 | 0.81  | 0.22 | 0.49  | 0.16 | 0.19  | 0.10 | 0.02  | 0.11 | -0.04 | 0.07 | -0.08 | 0.10 |
| Montroydite-CSM            | 2 | 1.39  | 0.24 | 0.99  | 0.18 | 0.66  | 0.16 | 0.26  | 0.11 | -0.05 | 0.11 | -0.04 | 0.06 | -0.09 | 0.10 |
| Metacinnabar               | 1 | -0.07 |      | -0.10 |      | -0.01 |      | -0.05 |      | -0.05 |      | 0.03  |      | -0.03 |      |
| Cinnabar-CSM               | 3 | -1.65 | 0.25 | -1.16 | 0.33 | -0.82 | 0.17 | -0.23 | 0.12 | 0.09  | 0.15 | 0.01  | 0.04 | 0.19  | 0.06 |
| Cinnabar-CSM               | 1 | -1.6  |      | -1.06 |      | -0.75 |      | -0.18 |      | 0.14  |      | 0.06  |      | 0.22  |      |
| Cinnabar-USGS              | 2 | -1.72 | 0.24 | -1.19 | 0.10 | -0.82 | 0.14 | -0.25 | 0.10 | 0.10  | 0.03 | 0.04  | 0.09 | 0.19  | 0.12 |
| Terlinguaite/Kleinite-USGS | 3 | -2.7  | 0.28 | -1.80 | 0.35 | -1.29 | 0.14 | -0.33 | 0.10 | 0.23  | 0.15 | 0.07  | 0.03 | 0.36  | 0.05 |
| Terlinguaite-CSM           | 2 | -2.15 | 0.33 | -1.53 | 0.22 | -1.09 | 0.18 | -0.27 | 0.10 | 0.16  | 0.03 | 0.03  | 0.01 | 0.29  | 0.06 |
| Kleinite-CSM               | 3 | -2.15 | 0.33 | -1.44 | 0.29 | -1.05 | 0.16 | -0.25 | 0.10 | 0.17  | 0.03 | 0.03  | 0.00 | 0.29  | 0.08 |
| Cinnabar-McDermitt         |   |       |      |       |      |       |      |       |      |       |      |       |      |       |      |
| MCD100                     | 3 | -0.70 | 0.24 | -0.54 | 0.16 | -0.36 | 0.14 | -0.16 | 0.10 | -0.01 | 0.16 | 0.00  | 0.03 | 0.01  | 0.07 |
| MCD101                     | 2 | -0.64 | 0.24 | -0.39 | 0.10 | -0.30 | 0.14 | -0.14 | 0.10 | 0.09  | 0.11 | 0.03  | 0.06 | 0.02  | 0.10 |
| MCD102a                    | 2 | -0.52 | 0.25 | -0.32 | 0.10 | -0.21 | 0.14 | -0.13 | 0.17 | 0.07  | 0.13 | 0.05  | 0.01 | 0.00  | 0.11 |
| MCD102b                    | 2 | -0.56 | 0.24 | -0.44 | 0.10 | -0.26 | 0.14 | -0.18 | 0.13 | -0.01 | 0.04 | 0.02  | 0.02 | -0.04 | 0.15 |
| MCD102c                    | 2 | -0.50 | 0.24 | -0.36 | 0.10 | -0.25 | 0.14 | -0.15 | 0.10 | 0.01  | 0.11 | 0.00  | 0.06 | -0.03 | 0.10 |
| MCD102d                    | 2 | -0.42 | 0.24 | -0.41 | 0.11 | -0.24 | 0.14 | -0.11 | 0.10 | 0.01  | 0.50 | -0.03 | 0.07 | 0.00  | 0.11 |
| MCD102e                    | 2 | -0.61 | 0.24 | -0.45 | 0.12 | -0.28 | 0.14 | -0.12 | 0.10 | 0.01  | 0.11 | 0.03  | 0.06 | 0.04  | 0.10 |
| MCD102f                    | 4 | -0.69 | 0.26 | -0.46 | 0.17 | -0.36 | 0.14 | -0.18 | 0.10 | 0.06  | 0.18 | -0.01 | 0.04 | -0.01 | 0.06 |
| MCD103a                    | 3 | -0.58 | 0.24 | -0.39 | 0.10 | -0.31 | 0.14 | -0.12 | 0.12 | 0.04  | 0.11 | -0.02 | 0.06 | 0.03  | 0.10 |
| MCD103b                    | 2 | -0.60 | 0.24 | -0.48 | 0.27 | -0.26 | 0.14 | -0.15 | 0.10 | -0.03 | 0.11 | 0.04  | 0.06 | 0.00  | 0.10 |
| MCD104                     | 3 | -0.61 | 0.24 | -0.43 | 0.10 | -0.31 | 0.14 | -0.13 | 0.10 | 0.03  | 0.11 | 0.00  | 0.06 | 0.02  | 0.10 |
| Leachates-Terlingua        |   |       |      |       |      |       |      |       |      |       |      |       |      |       |      |
| 03MAR1                     | 2 | 2.09  | 0.34 | 1.59  | 0.24 | 1.06  | 0.25 | 0.50  | 0.18 | 0.02  | 0.06 | 0.01  | 0.07 | -0.02 | 0.10 |
| 03MAR2                     | 2 | 0.82  | 0.09 | 0.62  | 0.08 | 0.40  | 0.05 | 0.26  | 0.06 | 0.00  | 0.06 | -0.01 | 0.03 | 0.05  | 0.05 |
| 03MAR3                     | 2 | 0.20  | 0.09 | 0.20  | 0.08 | 0.12  | 0.05 | 0.17  | 0.06 | 0.05  | 0.06 | 0.02  | 0.03 | 0.12  | 0.05 |
| 03MSM5                     | 2 | 1.11  | 0.20 | 0.88  | 0.12 | 0.54  | 0.10 | 0.47  | 0.16 | 0.04  | 0.06 | -0.02 | 0.03 | 0.19  | 0.11 |
| 03SB1                      | 2 | 0.71  | 0.18 | 0.66  | 0.20 | 0.39  | 0.13 | 0.30  | 0.06 | 0.13  | 0.06 | 0.03  | 0.04 | 0.18  | 0.05 |
| 03SB4                      | 2 | -0.17 | 0.09 | -0.12 | 0.08 | -0.08 | 0.05 | -0.02 | 0.06 | 0.00  | 0.06 | 0.01  | 0.03 | 0.03  | 0.08 |
| 03TER1a                    | 2 | 0.54  | 0.35 | 0.43  | 0.34 | 0.32  | 0.13 | 0.24  | 0.10 | 0.04  | 0.13 | 0.03  | 0.03 | 0.10  | 0.05 |

|                     |   |       |      |       |      |       |      |       |      |      |      |      |      |      |      |
|---------------------|---|-------|------|-------|------|-------|------|-------|------|------|------|------|------|------|------|
| 03TER1b             | 2 | 0.64  | 0.35 | 0.49  | 0.34 | 0.33  | 0.17 | 0.19  | 0.10 | 0.01 | 0.08 | 0.01 | 0.03 | 0.03 | 0.05 |
| Leachates-McDermitt |   |       |      |       |      |       |      |       |      |      |      |      |      |      |      |
| 99MCD1a             | 2 | -1.43 | 0.20 | -0.96 | 0.16 | -0.70 | 0.12 | -0.32 | 0.07 | 0.11 | 0.06 | 0.02 | 0.03 | 0.04 | 0.13 |
| 99MCD1b             | 2 | -1.49 | 0.08 | -0.99 | 0.10 | -0.71 | 0.04 | -0.06 | 0.32 | 0.12 | 0.06 | 0.04 | 0.03 | 0.32 | 0.33 |

a. MAR=Mariposa mine, MSM=Mariscal mine, SB=Study Butte mine, TER=Terlingua mine, MCD=McDermitt mine.

b. The 2sd error for each sample is calculated from replicate analyses of the sample. Where the calculated 2sd was smaller than that of the replicate analyses of the secondary standard UM-Almadén, the value for UM-Almadén is used for the uncertainty of the  $\delta^x\text{Hg}$ .

c. The  $\Delta^x\text{Hg}$  values were calculated using the approximated formulas published in Blum and Bergquist, 2007.

Table S-2. Isotopic composition of Hg in cinnabar samples from the McDermitt mine relative to NIST 3133. Samples MCD102a-f represent replicate digestions of cinnabar from a single sample of ore. Each digested sample was analyzed for isotopic composition and the average of n isotopic measurements reported.

| Sample                           | n  | $\delta^{202}\text{Hg}$ (‰) | Description                     |
|----------------------------------|----|-----------------------------|---------------------------------|
| Replicate digestions, single ore |    |                             |                                 |
| MCD102a                          | 2  | -0.52±0.24                  | Cinnabar in vein quartz         |
| MCD102b                          | 2  | -0.56±0.09                  | Cinnabar in vein quartz         |
| MCD102c                          | 2  | -0.50±0.18                  | Cinnabar in vein quartz         |
| MCD102d                          | 2  | -0.42±0.11                  | Cinnabar in vein quartz         |
| MCD102e                          | 2  | -0.60±0.09                  | Cinnabar in vein quartz         |
| MCD102f                          | 2  | -0.69±0.25                  | Cinnabar in vein quartz         |
| average                          | 14 | -0.57±0.25                  |                                 |
| Separate ore samples             |    |                             |                                 |
| MCD100                           | 3  | -0.70±0.16                  | Cinnabar in sinter <sup>a</sup> |
| MCD101                           | 2  | -0.64±0.09                  | Cinnabar in sinter <sup>a</sup> |
| MCD102                           | 14 | -0.57±0.26                  | Cinnabar in vein quartz         |
| MCD103                           | 5  | -0.59±0.09                  | Cinnabar in vein quartz         |
| MCD104                           | 3  | -0.61±0.12                  | Cinnabar in sinter              |
| average                          | 27 | -0.60±0.20                  |                                 |

Table S-3: Total and leachable Hg in mine-waste calcine samples from the Terlingua District and McDermitt mine.

| sample                                 | total Hg<br>( $\mu\text{g g}^{-1}$ ) | leachable <sup>a</sup><br>Hg ( $\mu\text{g L}^{-1}$ ) | leachable<br>fraction of<br>total Hg | leachate<br>pH |
|----------------------------------------|--------------------------------------|-------------------------------------------------------|--------------------------------------|----------------|
| Mine-waste calcine -Terlingua District |                                      |                                                       |                                      |                |
| 03MAR1                                 | 170                                  | 64.1                                                  | 7.54E-03                             | 7.7            |
| 03MAR2                                 | 190                                  | 5                                                     | 5.26E-04                             | 7.4            |
| 03MAR3                                 | 35                                   | 0.28                                                  | 1.60E-04                             | 7.2            |
| 03MSM1                                 | 6.9                                  | <0.1                                                  | <2.90E-04                            | 7.3            |
| 03MSM2                                 | 31                                   | <0.1                                                  | <6.45E-05                            | 7.1            |
| 03MSM3                                 | 44                                   | <0.1                                                  | <4.55E-05                            | 7.1            |
| 03MSM4                                 | 110                                  | <0.1                                                  | <1.82E-05                            | 7.1            |
| 03MSM5                                 | 150                                  | <0.1                                                  | <1.33E-05                            | 7.3            |
| 03SB1                                  | 5900                                 | 102                                                   | 3.46E-04                             | 7.4            |
| 03SB2                                  | 12                                   | 0.32                                                  | 5.33E-04                             | 7.1            |
| 03SB3                                  | 480                                  | <0.1                                                  | <4.17E-06                            | 7.3            |
| 03SB4                                  | 3000                                 | 0.5                                                   | 3.33E-06                             | 3.8            |
| 03SB5                                  | 35                                   | 0.1                                                   | 5.71E-05                             | 7.3            |
| 03TER1                                 | 19000                                | 1118                                                  | 1.18E-03                             | 6.1            |
| 03TER2                                 | 14                                   | 1.04                                                  | 1.49E-03                             | 7.4            |
| 03TER3                                 | 16                                   | 0.23                                                  | 2.88E-04                             | 7.1            |
| 03TER4                                 | 170                                  | 0.1                                                   | 1.18E-05                             | 7.4            |
| 03Ter5                                 | 4.1                                  | 0.1                                                   | 4.88E-04                             | 7.1            |
| Mine-waste calcine -McDermitt          |                                      |                                                       |                                      |                |
| 99MCD1                                 | 1200                                 | 21                                                    | 3.50E-04                             | 8.8            |
| 99MCD2                                 | 43                                   | 0.2                                                   | 9.30E-05                             | 4.3            |
| 99MCD3a                                | 1400                                 | 0.2                                                   | 2.86E-06                             | 3.2            |
| 99MCD3b                                | 1400                                 | 0.2                                                   | 2.86E-06                             | 3.2            |
| 01MCD2                                 | 200                                  | NA                                                    | NA                                   | 4.3            |

a. A synthetic rainwater leach (US EPA method 1312) was performed on all calcines using 100g of waste material and 2L of synthetic rainwater. Leachates were filtered by 0.45 mm filter prior to analysis for total Hg in leachate.

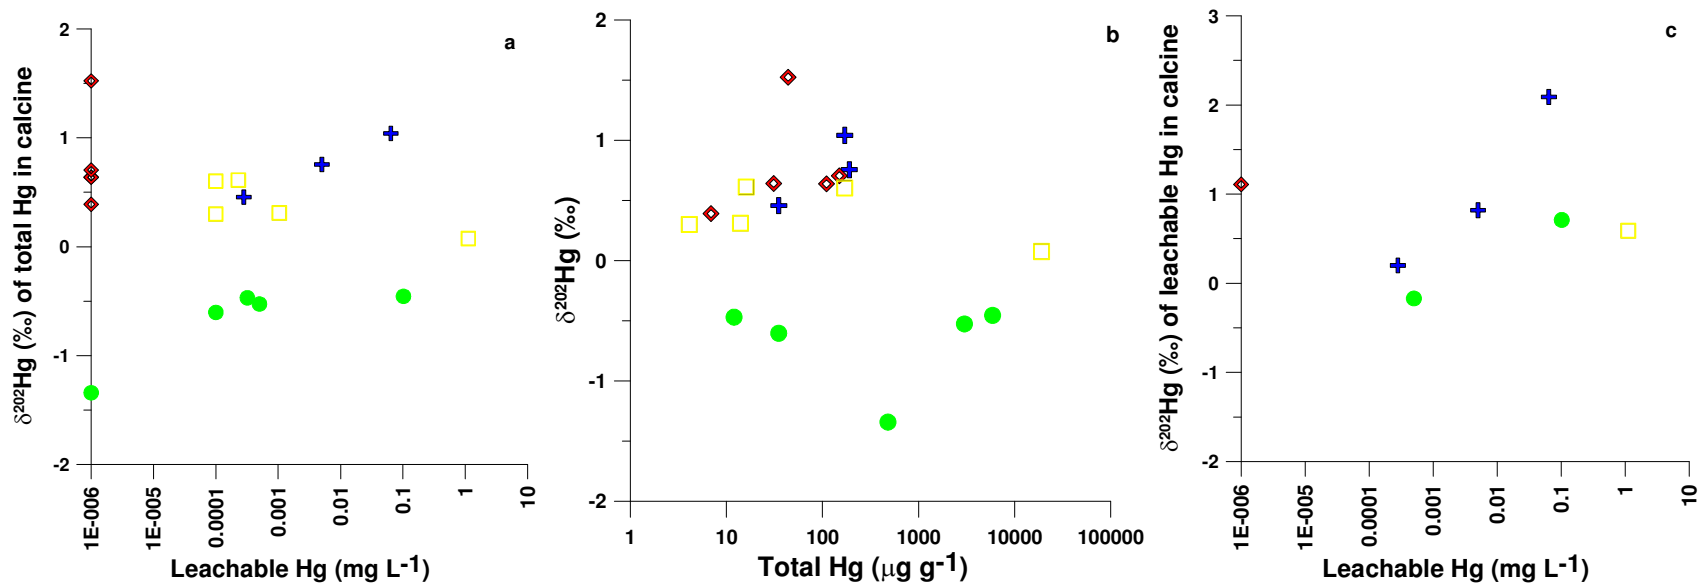

Figure S-1: Variation of Hg isotopic composition in calcines relative to synthetic rainwater leachable Hg concentration (a) and Hg total concentration (b) and variation of Hg isotopic composition in calcine leachates relative to synthetic rainwater leachable Hg concentration (c). Data are plotted by mine: + - Mariposa, ◇ - Mariscal, ● - Study Butte, □ - Terlingua, ▲ - McDermitt.
